# Supplementary material for: NO reduction over an Al-embedded MoS2 monolayer: a first-principles study
Source: Royal Society of Chemistry journal article supplement (doi:10.1039/c9ra05759e), 2019-01-01

## “Supporting Information”

# NO reduction over Al-embedded MoS<sub>2</sub> monolayer: A first-principles study

**Mehdi D. Esrafil** \* and **Safa Heydari**

Department of Chemistry, Faculty of Basic Sciences, University of Maragheh, P.O. Box 55136-553, Maragheh, Iran

\* Corresponding author. **Phone:** (+98) 4212237955. **Fax:** (+98) 4212276060. **P.O. Box:** 55136-553. **E-mail:** [esrafil@maragheh.ac.ir](mailto:esrafil@maragheh.ac.ir) (Mehdi D. Esrafil).

**Figure S1.** The energy diagram and optimized stationary points for the diffusion of the Al atom on defective MoS<sub>2</sub>

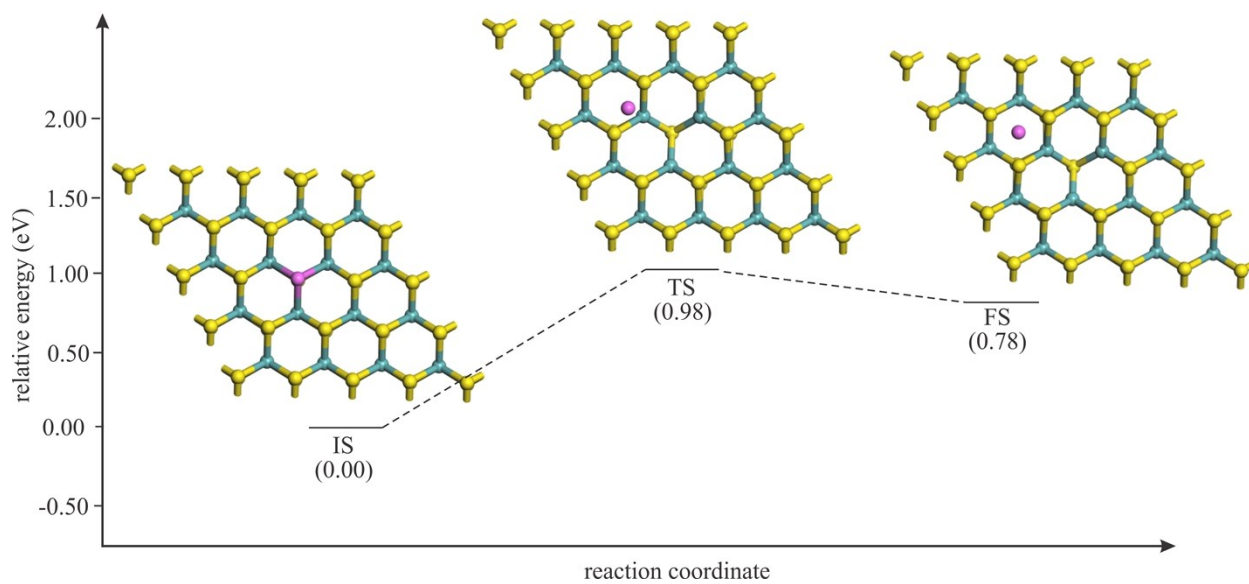

**Figure S2.** The frontier molecular orbitals of isolated NO and CO molecules

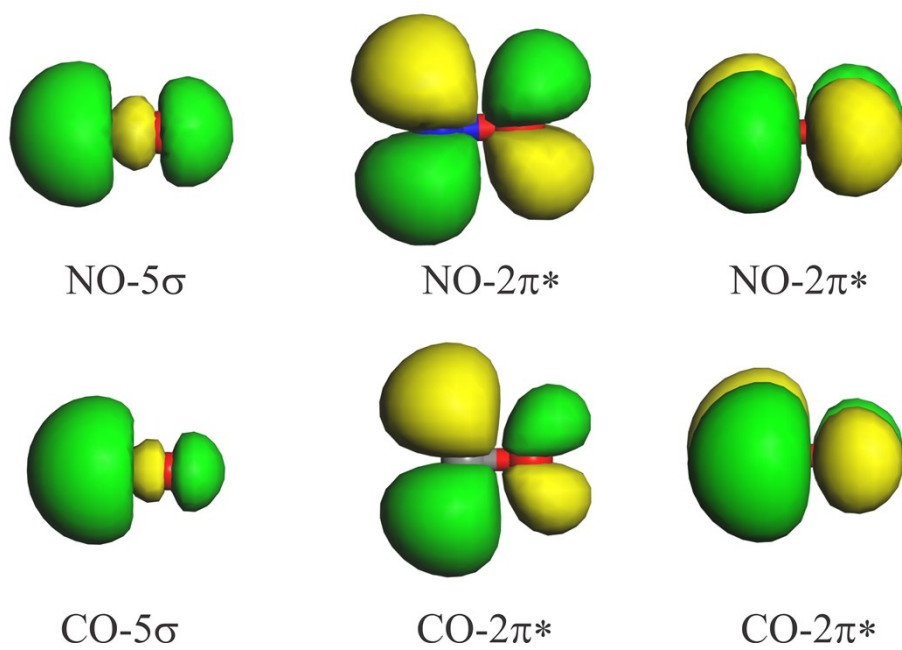

Supplement: c9ra05759e1.pdf [file c9ra05759e1.pdf]
